# Supplementary material for: One-step construction of ferritin encapsulation drugs for cancer chemotherapy
Source: Royal Society of Chemistry journal article supplement (doi:10.1039/d0nr04019c), 2020-12-22
Supplement: d0nr04019c1.pdf [file d0nr04019c1.pdf]

## Supplementary information

### One-step construction of ferritin encapsulation drugs for cancer chemotherapy

Ippei Inoue,<sup>\*a</sup> Mayumi Chiba,<sup>a</sup> Kenichiro Ito,<sup>a</sup> Yoriko Okamatsu,<sup>b</sup> Yasuyo Suga,<sup>b</sup> Yoshiro Kitahara,<sup>b</sup> Yuichi Nakahara,<sup>a</sup> Yuta Endo,<sup>a</sup> Kazutoshi Takahashi,<sup>a</sup> Uno Tagami,<sup>a</sup> and Naofumi Okamoto<sup>c</sup>

<sup>a</sup> Research Institute for Bioscience Products & Fine Chemicals, Ajinomoto Co., Inc. 1-1, Suzuki-cho, Kawasaki-ku, Kawasaki-shi, Kanagawa 210-8681, Japan

<sup>b</sup> Institute of Food Sciences and Technologies, Ajinomoto Co., Inc. 1-1, Suzuki-cho, Kawasaki-ku, Kawasaki-shi, Kanagawa 210-8681, Japan

<sup>c</sup> Graduate School of Materials Science, Nara Institute of Science and Technology, 18916-5 Takayama, Ikoma, Nara, 630-0192, Japan

\* Corresponding author: ippei\_inoue@ajinomoto.com

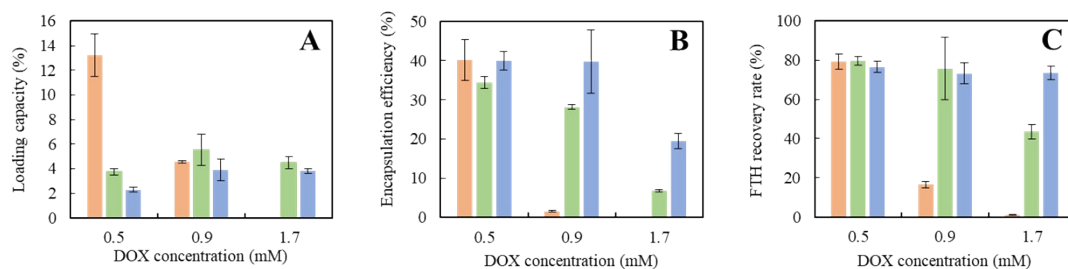

**Figure S1.** FTH concentration dependency of the one-step method. (A) The loading capacity, (B) DOX-encapsulation efficiency and (C) FTH recovery rate (means  $\pm$  standard deviation,  $n = 3$ ). DOX was added to 50 mM Tris-HCl buffer (pH 9.0) with FTH [ $1 \text{ mg mL}^{-1}$  (red bar),  $5 \text{ mg mL}^{-1}$  (green bar),  $10 \text{ mg mL}^{-1}$  (blue bar)]. After 1 h incubation at  $60^\circ\text{C}$ , DOX-FTH was purified using ultrafiltration (Vivaspin 500-100K).

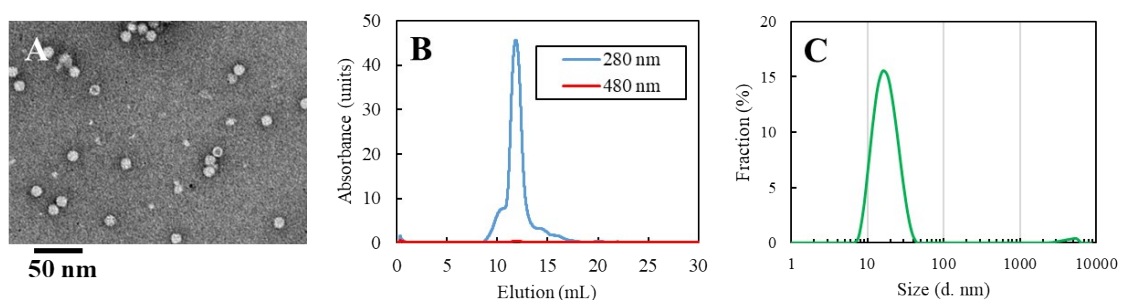

**Figure S2.** Characterisation of apo-ferritin nanoparticles. (A) TEM image of apo-ferritin. (B) SEC analyses of apo-ferritin. FTH protein was detected using absorbance at 280 nm (blue line) and 480 nm (red line). (C) DLS analysis of apo-ferritin size distribution. Diameter of apo-ferritin was 16.19 nm using intensity mode. The Pdi value was 0.150.

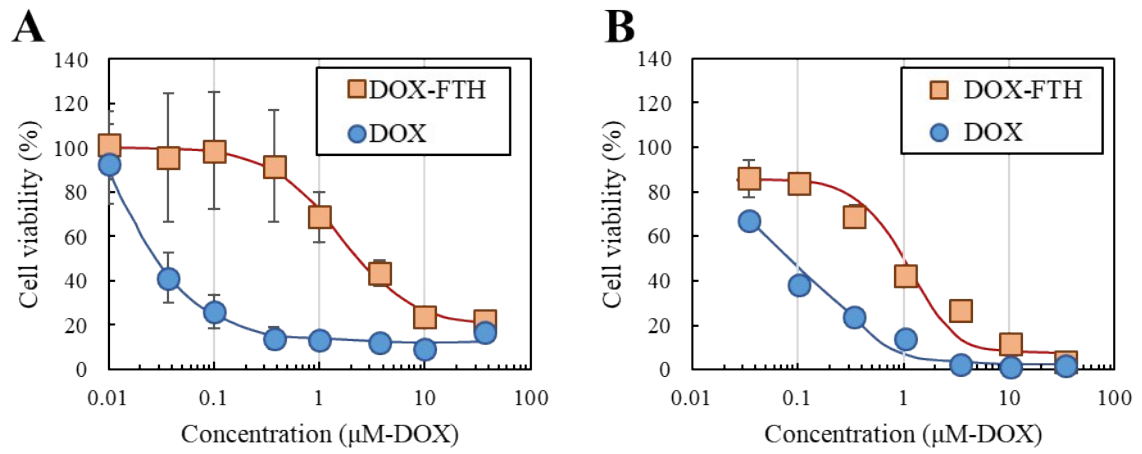

**Figure S3.** Dose-dependent cytotoxicity of DOX-FTH. Cell viability of (A) HEK293 cells ( $n = 3$ ) and (B) colon-26 cells ( $n = 2$ ) treated with DOX-FTH and free DOX measured by WST-8.

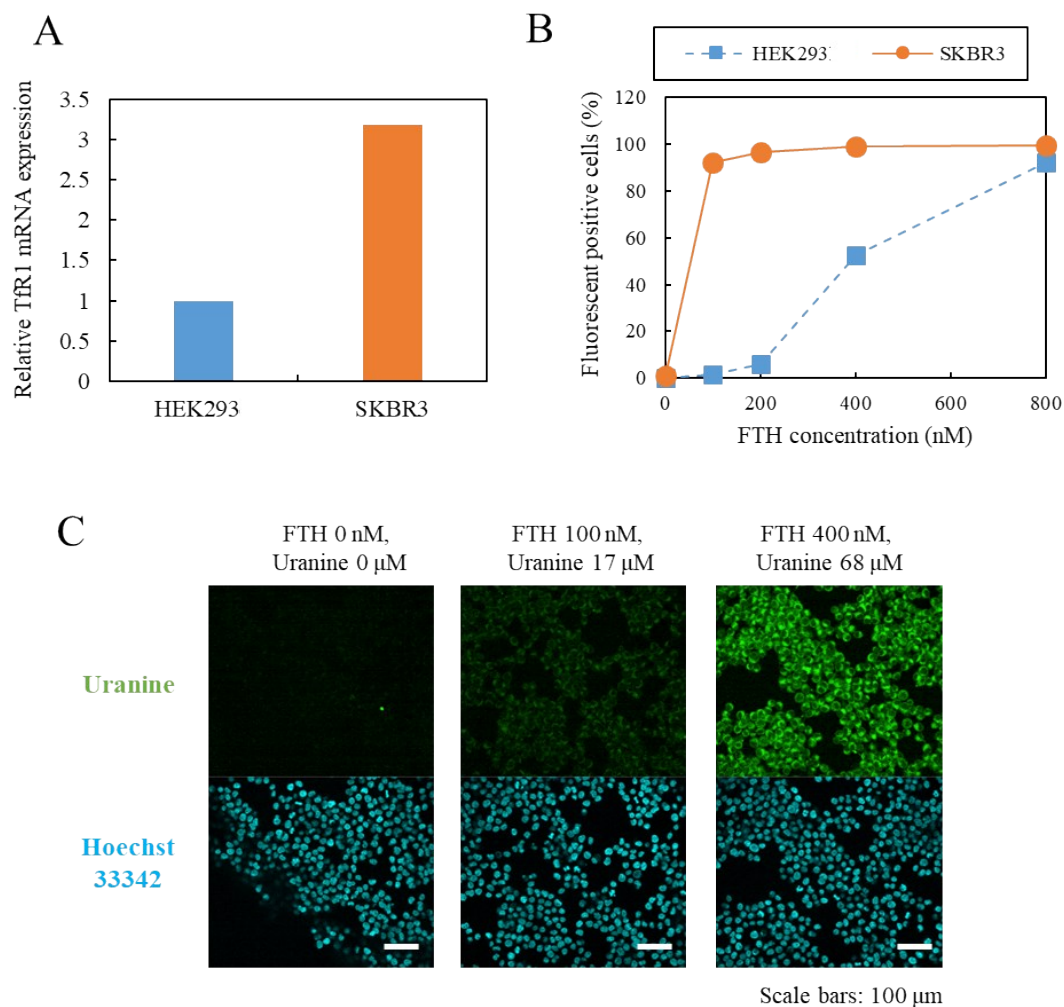

**Figure S4.** Comparison of FTH-uptake efficiencies of two cell lines expressing TfR1 at different levels. HEK293 (TfR1-low) and SKBR-3 (TfR1-high) cell lines were used. (A) qPCR analysis of TfR1 mRNA expression levels of HEK293 and SKBR-3 cells. Mean values of relative expression levels are shown (n = 2). (B) Flow cytometric analysis of FTH-uptake by the cells. Fluorescence-positive fractions were quantified in HEK293 (blue) and SKBR-3 (orange) treated with 0–800 nM Fluo-FTH. (C) Confocal microscopic images of HEK293 cells incubated with 0–400 nM of uranine dye (green)-loaded FTH for 24 h at 37 °C. Nuclei were labelled with Hoechst33342 (cyan).

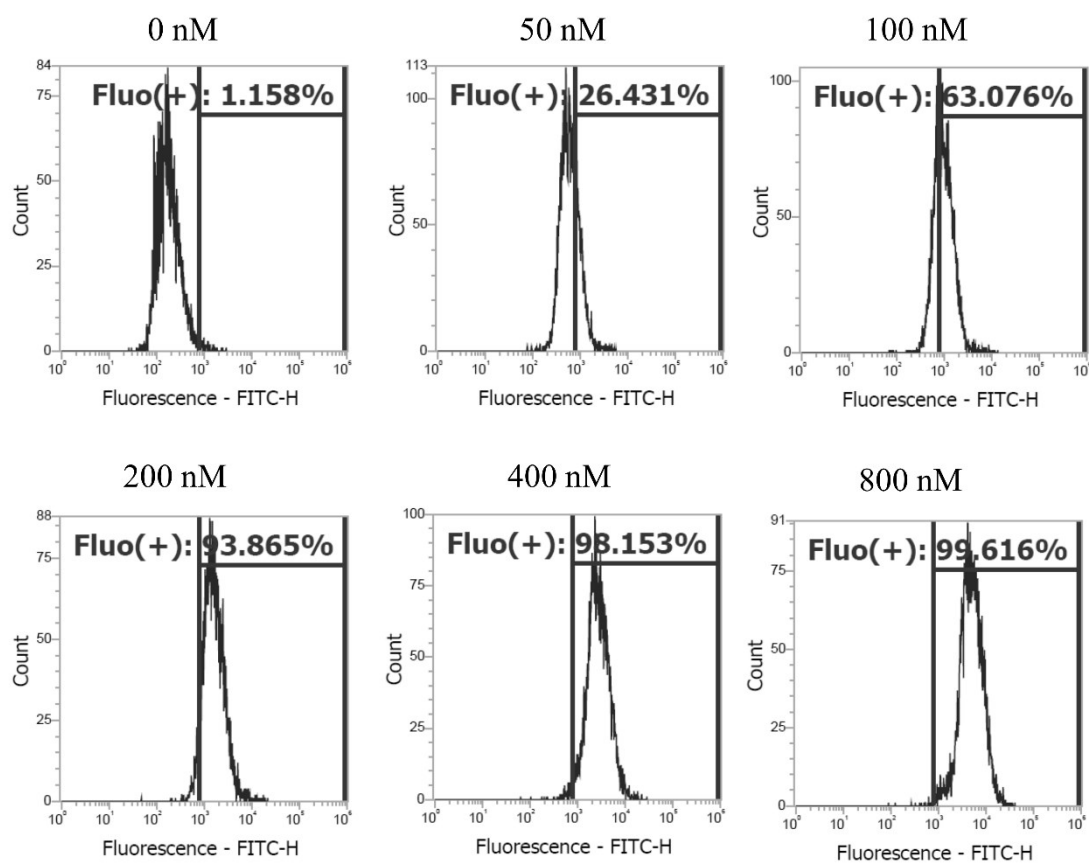

**Figure S5.** Flow cytometry analysis of SKBR-3 cells treated with 0–800 nM of Fluo-FTH. Fractions of fluorescence-positive cells were quantified.

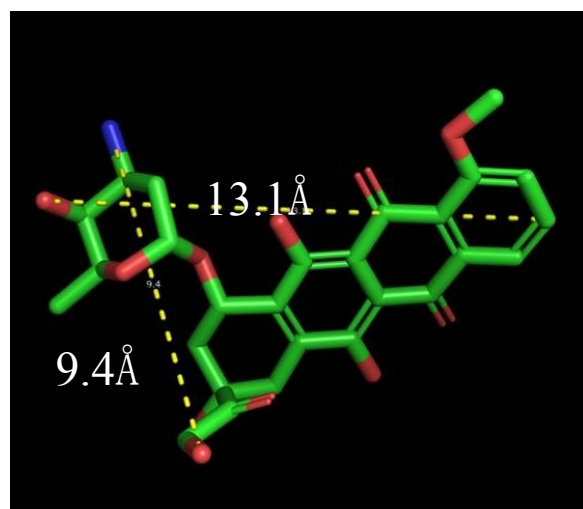

**Figure S6.** DOX structure demonstrating its size.

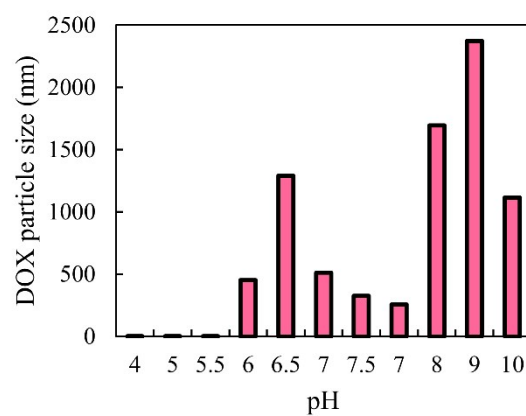

**Figure S7.** DLS analysis of DOX aggregate formulation. To observe DOX aggregates, 0.5 mM of DOX was incubated in various pH buffers at 60 °C for 60 min. After incubation, the size of DOX particles was measured by Zetasizer Nano.

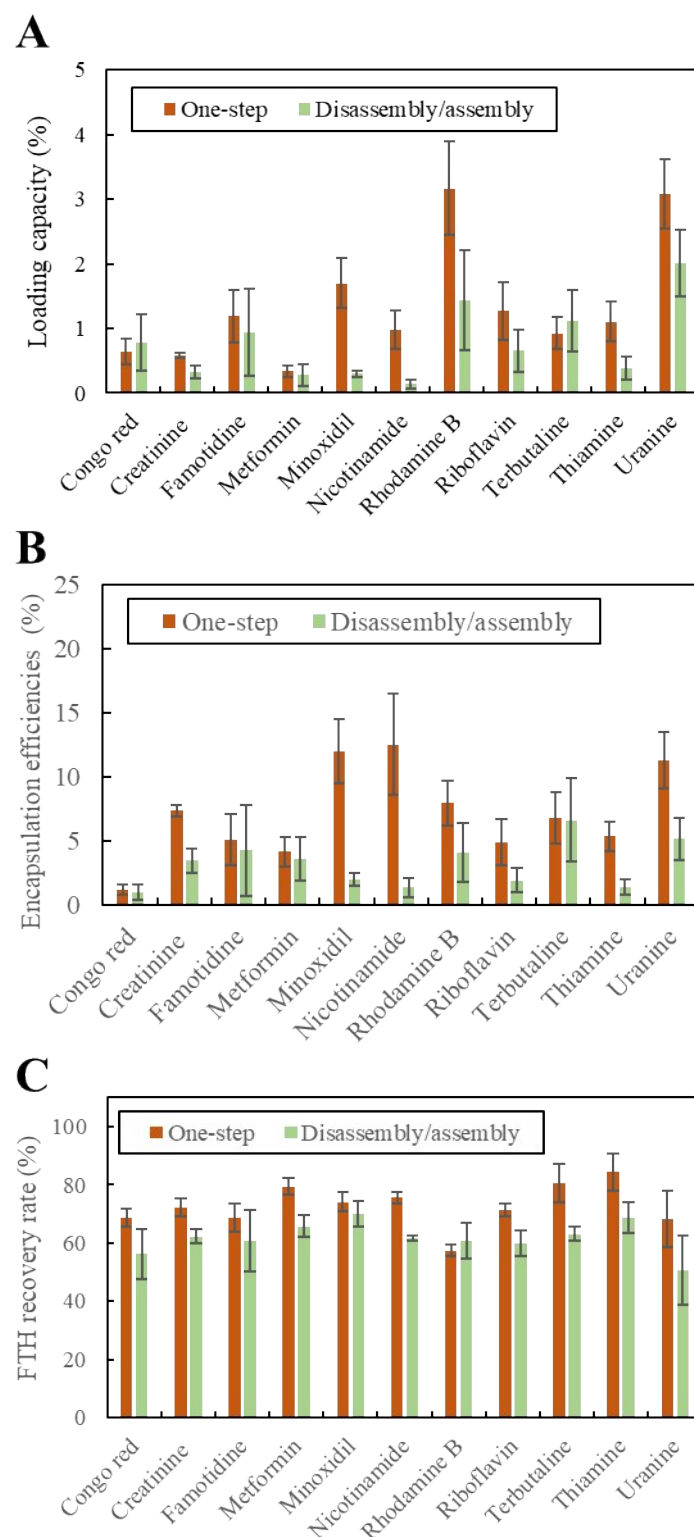

**Figure S8.** Comparison of the one-step method and conventional method with various chemical molecules. (A) Loading capacities, (B) drug-encapsulation efficiency and (C) FTH recovery rate (means  $\pm$  standard error,  $n = 3\sim 4$ ).

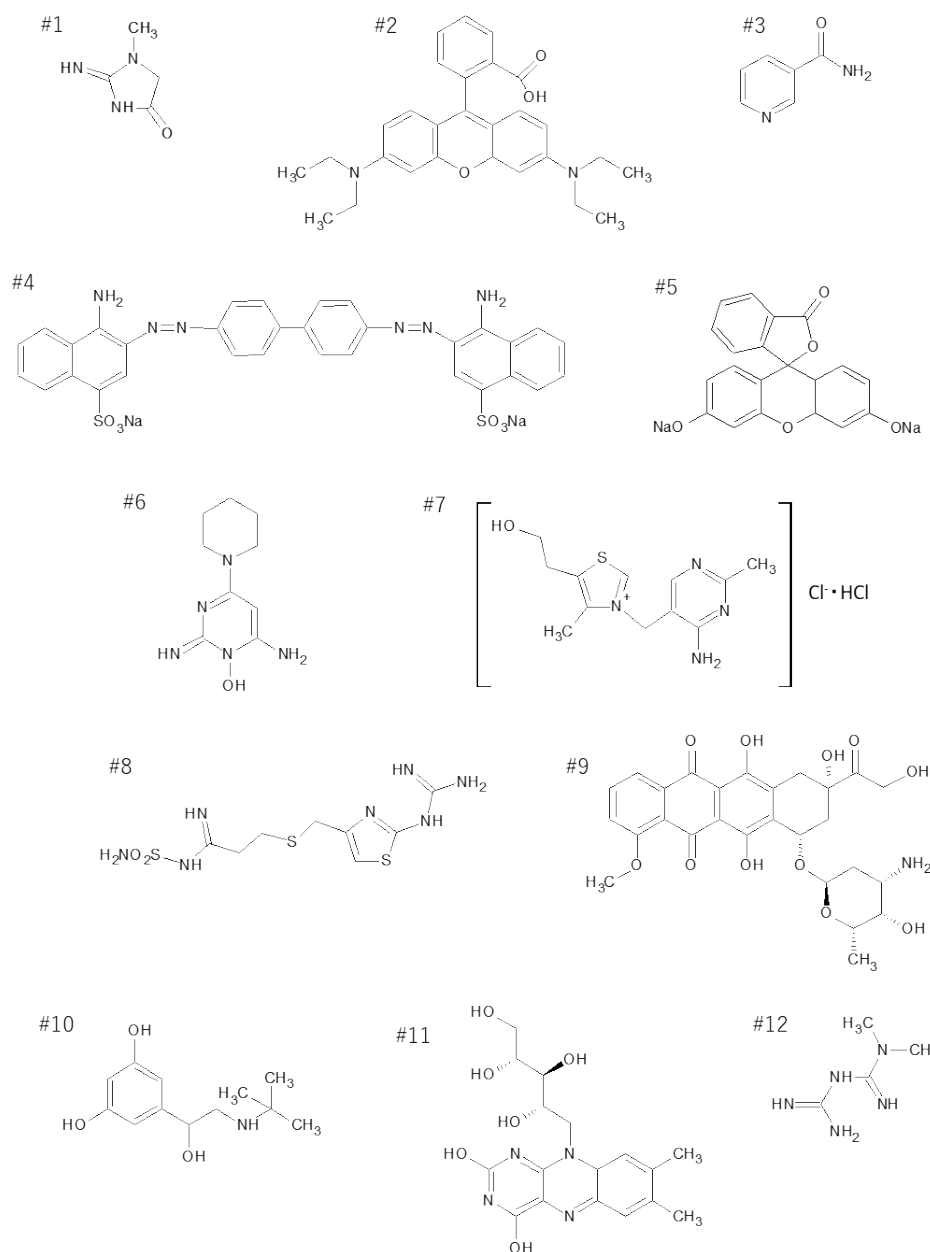

**Figure S9.** Chemical structure of molecules encapsulated in ferritin. #1; creatinine, #2; rhodamine B, #3; nicotinamide, #4; Congo red, #5; Uranine, #6; minoxidil, #7; thiamine, #8; famotidine, #9; doxorubicin, #10; terbutaline, #11; riboflavin and #12; metformin. Numbers on structures corresponds with the drugs in Figure 6.

**Table S1.** Reaction conditions for the one-step method for various chemicals

| Chemical            | Buffer, pH                  | Temp. (°C) |
|---------------------|-----------------------------|------------|
| <b>Creatinine</b>   | Acetate, pH4                | 60         |
| <b>Nicotinamide</b> | Acetate, pH4                | 40         |
| <b>Rhodamine B</b>  | Acetate, pH5                | 60         |
| <b>Uranine</b>      | Acetate, pH5                | 40         |
| <b>Congo red</b>    | Phosphate, pH6              | 60         |
| <b>Famotidine</b>   | Phosphate, pH6              | 60         |
| <b>Minoxidil</b>    | Phosphate, pH6              | 40         |
| <b>Thiamine</b>     | Phosphate, pH6              | 40         |
| <b>Metformin</b>    | Tris-HCl, pH8               | 60         |
| <b>Terbutaline</b>  | Carbonate-bicarbonate, pH10 | 60         |
| <b>Riboflavin</b>   | Carbonate-bicarbonate, pH10 | 40         |

**Table S2.** Primer list

| Gene            | Primer sequence (5'–3')                                   |
|-----------------|-----------------------------------------------------------|
| <b>TFRC</b>     | F: TGGCAGTTCA AATGATGGA<br><br>R:<br>AGGCTGAACCGGGTATATGA |
| <b>18S rRNA</b> | F: TGAGAAACGGCTACCACATC<br><br>R:<br>TTACAGGGCCTCGAAAGAGT |

**Table S3.** Cytotoxicity of DOX-FTH.

|                                     | SKBR3 | HEK293 | Colon26 |
|-------------------------------------|-------|--------|---------|
| <b>DOX IC<sub>50</sub> (μM)</b>     | 0.66  | 0.03   | 0.07    |
| <b>DOX-FTH IC<sub>50</sub> (μM)</b> | 0.87  | 3.01   | 0.81    |
| <b>Rate</b>                         | 1.3   | 92.8   | 11.6    |
